# Supplementary material
Source: PubMed Central journal article supplement (PMC4551352)

# Supplemental Figure-S1 (R1)

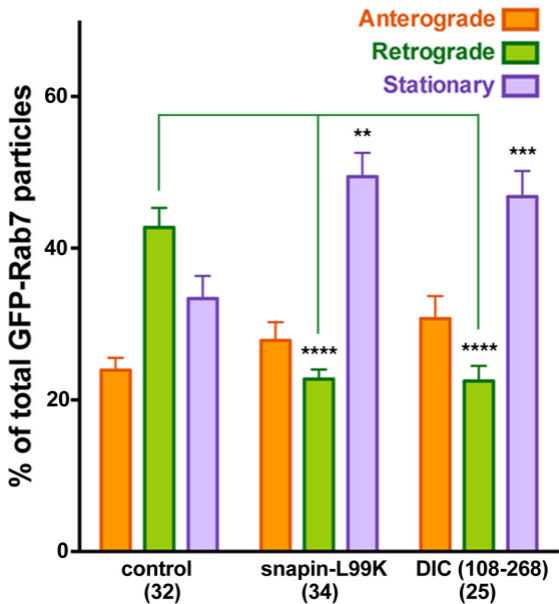

# Supplemental Figure-S2 (R1)

**A****Dendra-synaptophysin**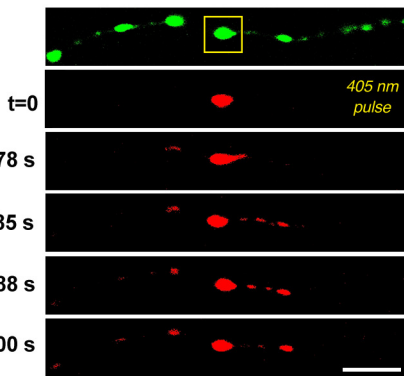**B**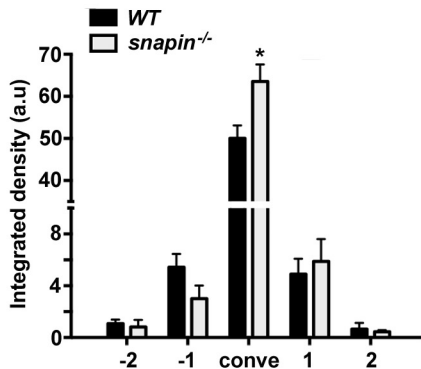**C****GFP-Rab7****Oyster-labeled anti-Syt**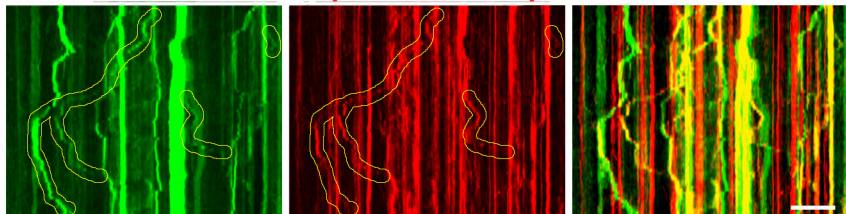

# Supplemental Figure-S3 (R1)

**A**
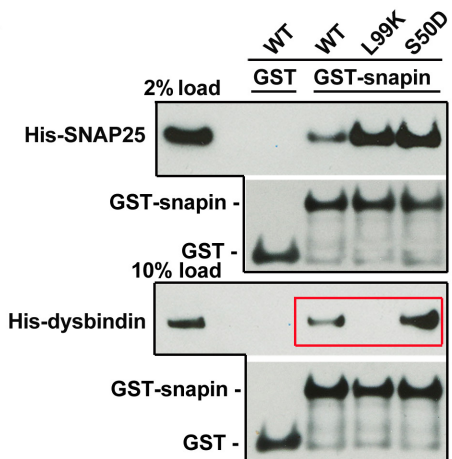
**B**
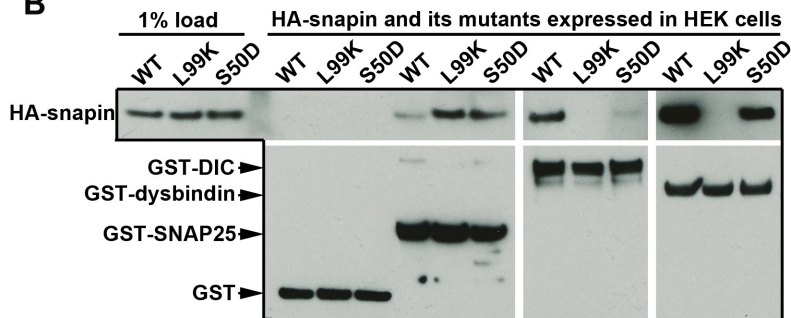
**C**
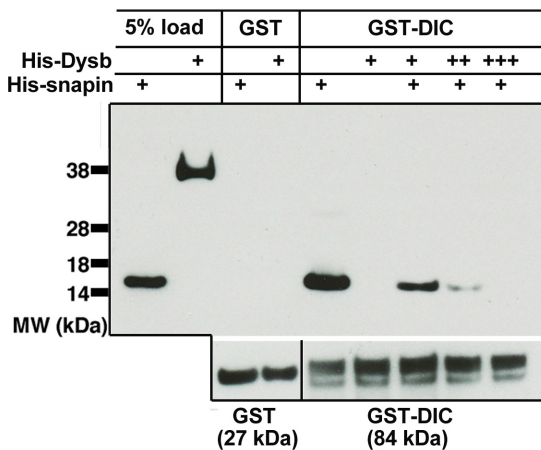
**D**
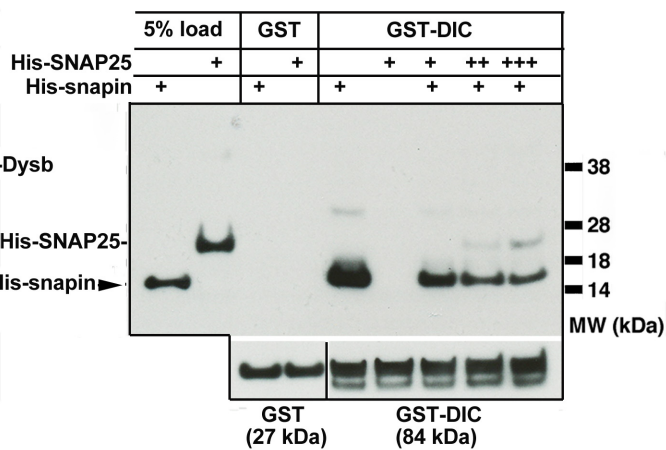
**E**
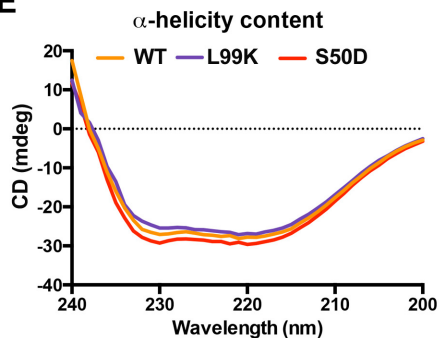

# Supplemental Figure-S4 (R1)

**A**

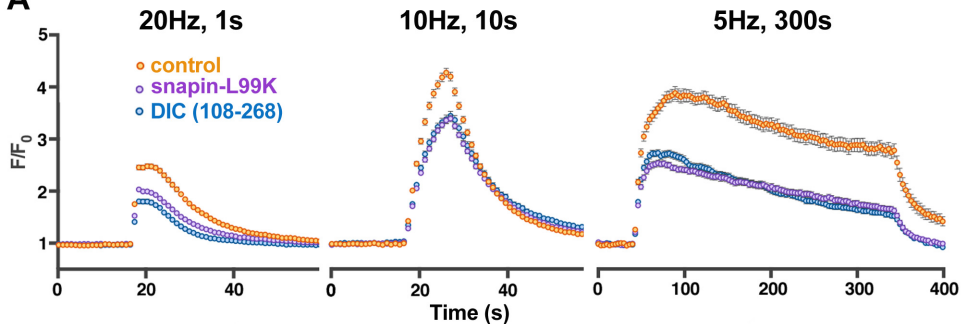

**B**

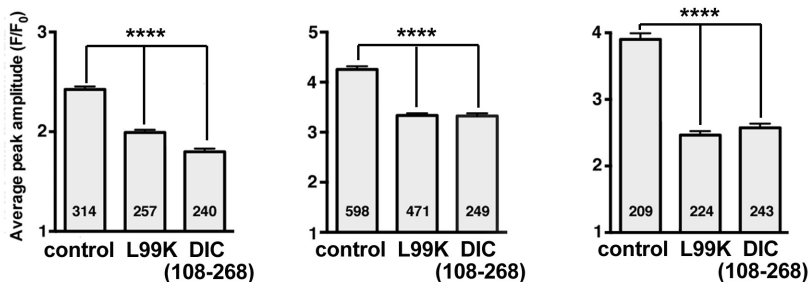

# Supplemental Figure-S5 (R1)

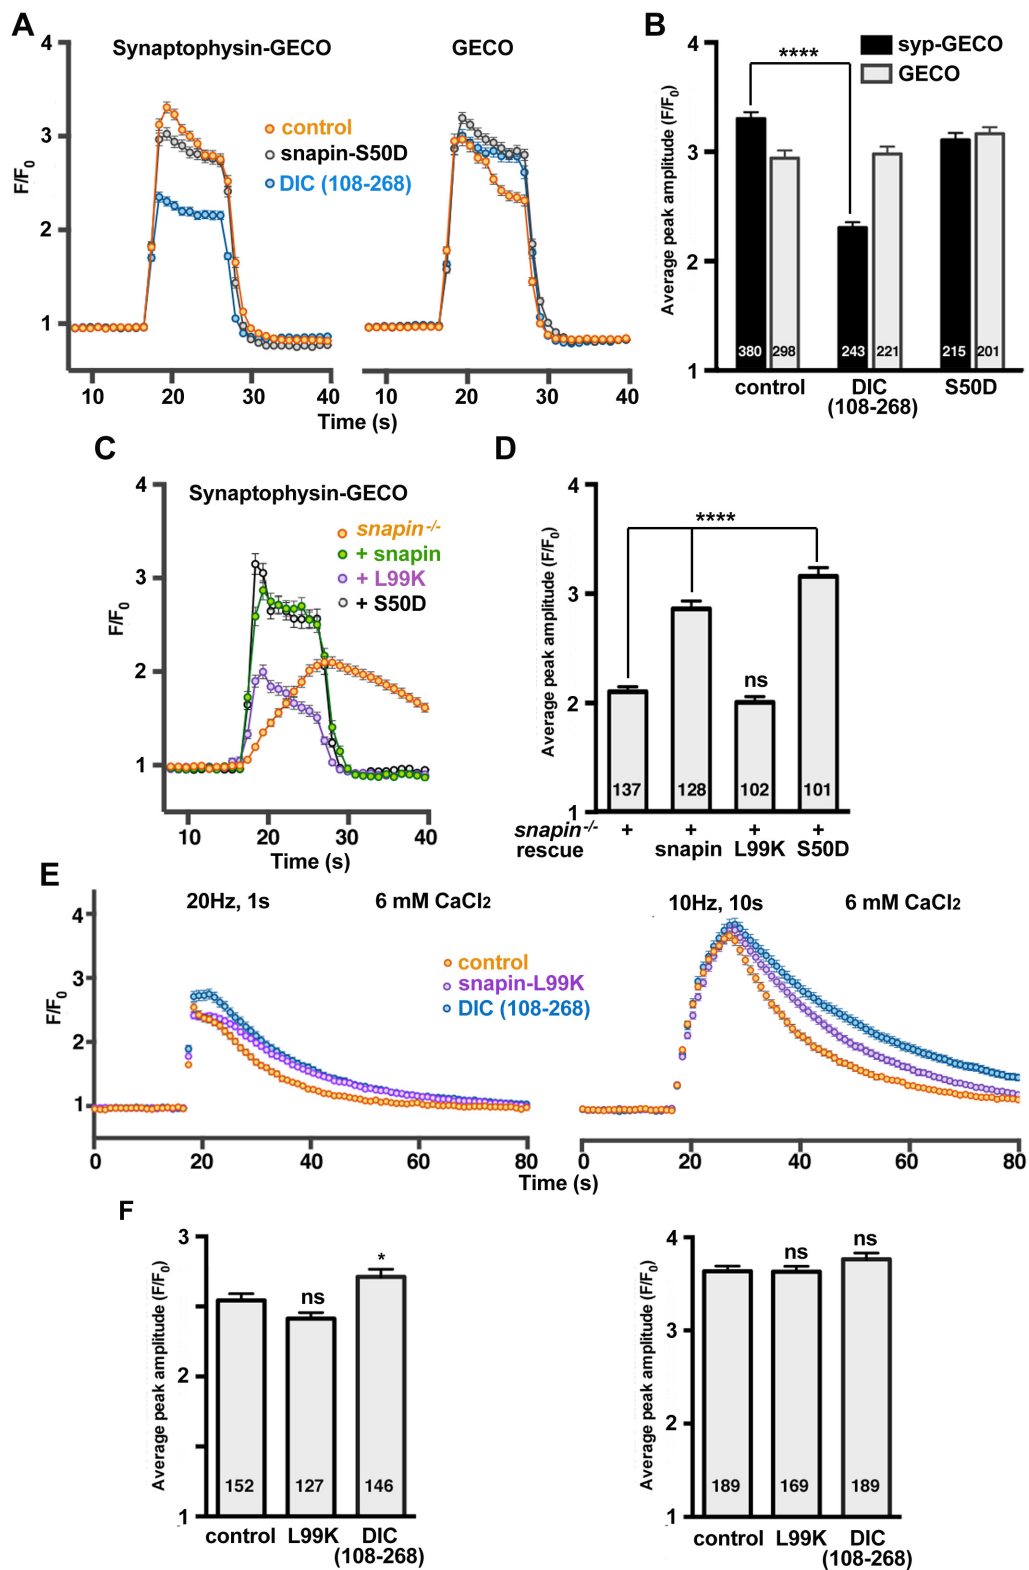

Supplement: embj0034-2059-sd1.pdf [file embj0034-2059-sd1.pdf]
